# Supplementary material
Source: publisher figshare collection journal article supplement (https://springernature.figshare.com/ndownloader/files/24141589)

759  
Samples  
Received

110 Samples Fail Genotyping:  
>5 Missing ("X") Calls

649  
Samples  
Passed

176 Polygenomic Samples:  
>2 Mixed ("N") Calls

473  
Monogenomic  
Samples Analyzed

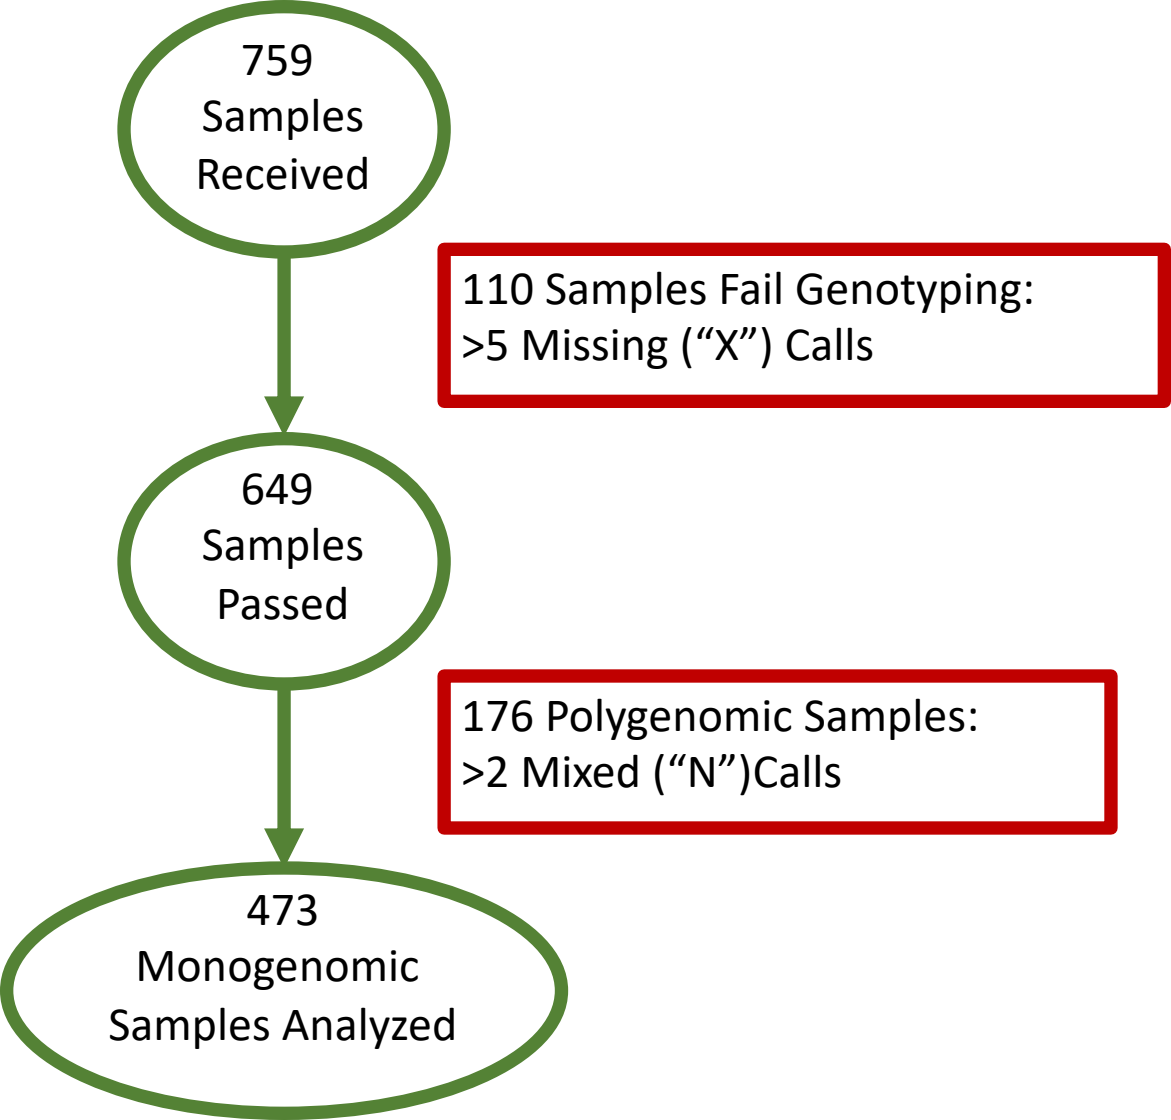

Supplement: Supplementary file [file 24141589]
